# Supplementary material for: Inspiration for revival of old drugs: improving solubility and avoiding hygroscopicity of pipemidic acid by forming two pharmaceutical salts based on charge-assisted hydrogen bond recognitions
Source: Royal Society of Chemistry journal article supplement (doi:10.1039/d1nj03314j), 2021-01-01

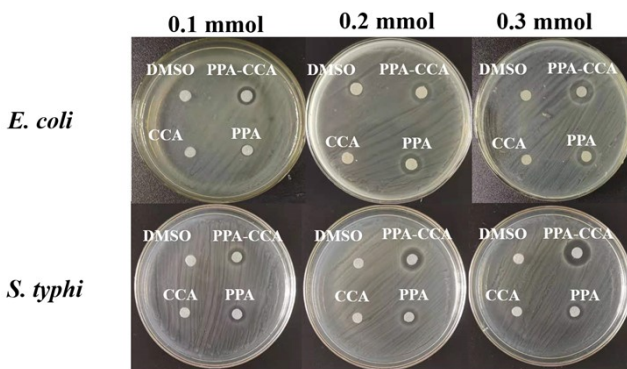

Fig. S1. Results of inhibitory zones of PPA and PPA-CCA on *E. coli* and *S. typhi*.

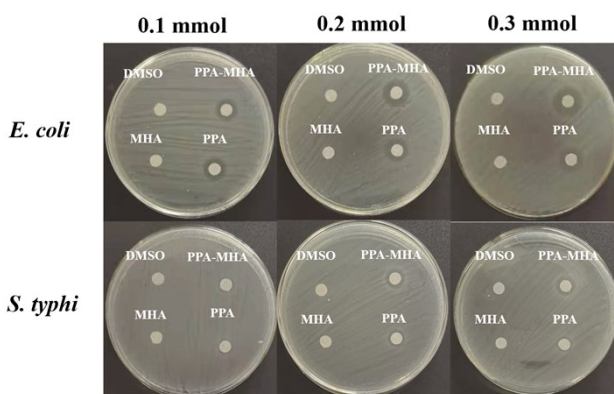

Fig. S2. Results of inhibitory zones of PPA and PPA-MHA on *E. coli* and *S. typhi*.

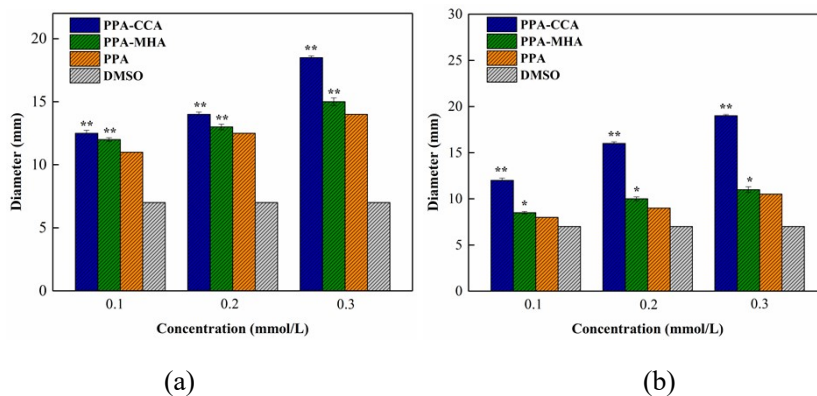

Fig. S3. Diameter of inhibitory zones of PPA-CCA, PPA-MHA, PPA and DMSO on (a) *E. coli* and (b) *S. typhi*, (note: \*indicated  $P < 0.05$ , \*\*indicated  $P < 0.01$ ).

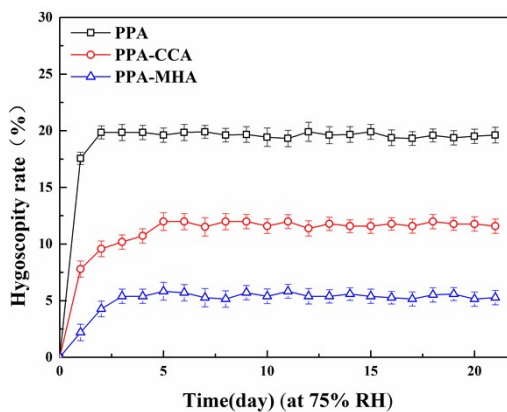

Supplement: d1nj03314j1.pdf [file d1nj03314j1.pdf]
